# Supplementary material
Source: PubMed Central journal article supplement (PMC240753)
Supplement: pnas_100_22_13111__2.pdf [file pnas_100_22_13111__2.pdf]

**Table 4. Sample numbers, field locations, sediment type, Global Position System coordinates, depth, total inorganic carbon concentrations (TIC), and  $^{87}\text{Sr}/^{86}\text{Sr}$  values for soils, soil waters, other waters, and cobs from sites in the San Juan Basin**

| Sample site/no. |                                            |                     |                              |
|-----------------|--------------------------------------------|---------------------|------------------------------|
| Newcomb         | Field location                             | Sediment type       | Location,<br>decimal degrees |
| CTW#3           | Captain Tom Wash (lower drainage)          | floodplain          | 36.30743 108.70554           |
| CTW#3A          |                                            | eolian              | 36.30759 108.70571           |
| CTW#3B          |                                            | eolian              | 36.30759 108.70571           |
| CTW#3C          |                                            | eolian              | 36.30759 108.70571           |
| CTW#2           | Captain Tom Wash (upper drainage)          | floodplain          | 36.27867 108.74463           |
| CTW#2A          |                                            | floodplain          | 36.27873 108.74469           |
| CTW#2B          |                                            | floodplain          | 36.27873 108.74469           |
| CTW#2C          |                                            | floodplain          | 36.27873 108.74469           |
| CTW#1           | Captain Tom Wash (upper drainage)          | floodplain          | 36.27650 108.74702           |
| CTW#1A          |                                            | floodplain          | 36.27648 108.74703           |
| CTW#1B          |                                            | floodplain          | 36.27648 108.74703           |
| CTW#1C          |                                            | floodplain          | 36.27648 108.74703           |
| SS#2            | Skunk Springs (upper drainage)             | floodplain modern   | 36.23129 108.75751           |
| SS#3            |                                            | floodplain          | 36.23129 108.75751           |
| SS#1            |                                            | floodplain          | 36.23129 108.75751           |
| SSW#2           | Skunk Springs Well #4                      |                     |                              |
| BMS#2           | Bridge @ Basketmaker site #5               |                     |                              |
| Chaco Canyon    |                                            |                     |                              |
| CC#1            | S Side of arroyo across from Casa Chiquita | floodplain          | 36.06535 107.97340           |
| CC#2            |                                            | floodplain          | 36.06535 107.97340           |
| CC#3            |                                            | floodplain          | 36.06535 107.97340           |
| PDA#5           | Chaco Wash near Pueblo Arroyo              | floodplain modern   | 36.06238 107.96733           |
| PDA#4           |                                            | floodplain          | 36.06238 107.96733           |
| PDA#3           |                                            | floodplain          | 36.06238 107.96733           |
| PDA#1           |                                            | floodplain          | 36.06238 107.96733           |
| CK#1            | Chetro Kettle field at Chaco               | floodplain overbank | 36.05893 107.95065           |
| LH#3            | Lizard House field                         | floodplain overbank | 36.05717 107.94742           |
| CR#1            | Casa Rinconada field, G. Vivian site C-10  | fan                 | 36.05647 107.96025           |
| CR#2            |                                            | fan                 | 36.05647 107.96025           |
| CR#3            |                                            | fan                 | 36.05647 107.96025           |
| CKF#1           | Chetro Kettle field, G. Vivian site F-4    | fan                 | 36.05770 107.95058           |
| CKF#2           |                                            | fan                 | 36.05770 107.95058           |
| CKF#3           |                                            | fan                 | 36.05770 107.95058           |
| S10#1           | Section 10, G. Vivian site A-16            | fan                 | 36.07292 107.9855            |
| S10#2           |                                            | fan                 | 36.07292 107.9855            |
| S10#3           |                                            | fan                 | 36.07292 107.9855            |
| LH#1            | Lizard House arroyo at Chaco               | fan                 | 36.05717 107.94742           |
| LH#2            |                                            | fan                 | 36.05717 107.94742           |

|                 |                                     |                   |                                 |                 |
|-----------------|-------------------------------------|-------------------|---------------------------------|-----------------|
| WR#1            | Weritos Rincon                      | fan eolian        | 36.04916                        | 107.93951       |
| WR#2            |                                     | fan eolian        | 36.04806                        | 107.94022       |
| WER#1           |                                     | eolian            | 36.04811                        | 107.93974       |
| WER#2           |                                     | eolian            | 36.04811                        | 107.93974       |
| WER#3           |                                     | eolian            | 36.04811                        | 107.93974       |
| CDW#1           | Chaco deep well in Gallup Formation |                   |                                 |                 |
| CWW#1           | Water from Fajada drainage only     |                   |                                 |                 |
| CWW#2           | Chaco River at bridge               |                   |                                 |                 |
| Aztec Ruin      |                                     |                   |                                 |                 |
| AZR#6           | Aztec Ruin proximal fan in orchard  | fan               | 36.83585                        | 108.00066       |
| AZR#7           |                                     | fan               | 36.83585                        | 108.00066       |
| AZR#8           |                                     | fan               | 36.83585                        | 108.00066       |
| AZR#3           | Aztec Ruin distal fan               | fan               | 36.83659                        | 107.99519       |
| AZR#4           |                                     | fan               | 36.83659                        | 107.99519       |
| AZR#5           |                                     | fan               | 36.83659                        | 107.99519       |
| AZR#1           | Aztec Ruin Animas floodplain        | floodplain modern | 36.83519                        | 107.99332       |
| AZR#2           |                                     | floodplain        | 36.83519                        | 107.99332       |
| AR#1            | Animas R. at Farmington             |                   |                                 |                 |
| AR#3            | Animas R. at Farmington             |                   |                                 |                 |
| Salmon Ruin     |                                     |                   |                                 |                 |
| SR#4            | Salmon Ruin San Juan floodplain     | floodplain        | 36.70054                        | 108.02635       |
| SR#5            |                                     | floodplain        | 36.70054                        | 108.02635       |
| SR#6            |                                     | floodplain        | 36.70054                        | 108.02635       |
| SR#1            | Salmon Ruin orchard                 | fan               | 36.70192                        | 108.02656       |
| SR#2            |                                     | fan               | 36.70192                        | 108.02656       |
| SR#3            |                                     | fan               | 36.70192                        | 108.02656       |
|                 | San Juan River System               |                   |                                 |                 |
| SJR#1           | San Juan R. at Bloomfield           |                   | 36.69987                        | 107.98637       |
| SJR#2           | San Juan R. below Farmington        |                   | 36.72298                        | 108.22501       |
| AR#1            | Animas R. at Farmington             |                   | 36.72073                        | 108.20179       |
| SJR#3           | San Juan R. at Pagosa Spgs.         |                   | 37.26989                        | 106.99614       |
| LPR#1           | Piedra R. near Chimney Rx.          |                   | 37.22391                        | 107.34145       |
| LOPR#1          | Los Pinos W of Bayfield             |                   | 37.22910                        | 107.60936       |
| AR#2            | Animas R. at Durango                |                   | 37.25974                        | 107.87720       |
| SJR#4           | San Juan R. at Kirtland             |                   | 36.72280                        | 108.32448       |
| AR#3            | Animas R. at Farmington             |                   | 36.72068                        | 108.20161       |
| SJR#5           | San Juan R. at Bloomfield           |                   | 36.70001                        | 107.98640       |
| Sample site/no. |                                     |                   |                                 |                 |
| Newcomb         | Depth , cm                          | TIC, % C          | $^{87}\text{Sr}/^{86}\text{Sr}$ | Error (2 sigma) |
| CTW#3           | 5                                   | 0.60              | 0.709028                        | 0.000017        |
| CTW#3A          | 25-35                               |                   | 0.708830                        | 0.000021        |
| CTW#3B          | 55-65                               |                   | 0.708760                        | 0.000008        |
| CTW#3C          | 85-95                               |                   | 0.708709                        | 0.000016        |
| CTW#2           | 5                                   | 0.72              | 0.709062                        | 0.000023        |
| CTW#2A          | 25-35                               |                   | 0.709046                        | 0.000009        |
| CTW#2B          | 55-65                               |                   | 0.709215                        | 0.000015        |
| CTW#2C          | 85-95                               |                   | 0.709083                        | 0.000019        |
| CTW#1           | 1                                   | 0.66              | 0.709289                        | 0.000018        |
| CTW#1A          | 25-35                               |                   | 0.709018                        | 0.000009        |

|              |         |      |          |          |
|--------------|---------|------|----------|----------|
| CTW#1B       | 55-65   |      | 0.709240 | 0.000012 |
| CTW#1C       | 85-95   |      | 0.709290 | 0.000017 |
| SS#2         | 0       | 0.22 | 0.709119 | 0.00002  |
| SS#3         | 100     | 0.38 | 0.709349 | 0.000022 |
| SS#1         | 110     | 0.25 | 0.709331 | 0.000022 |
| SSW#2        |         |      | 0.709242 | 0.000015 |
| BMS#2        |         |      | 0.709366 | 0.000010 |
| Chaco Canyon |         |      |          |          |
| CC#1         | 70      |      | 0.709036 | 0.000013 |
| CC#2         | 100     |      | 0.709083 | 0.000015 |
| CC#3         | 130     |      | 0.709066 | 0.000011 |
| PDA#5        |         | 0.23 | 0.709044 | 0.000017 |
| PDA#4        | 20      | 0.23 | 0.709093 | 0.000014 |
| PDA#3        | 325     | 0.12 | 0.709155 | 0.000017 |
| PDA#1        | 440     | 0.17 | 0.709077 | 0.000023 |
| CK#1         | 5       | 0.24 | 0.709190 | 0.000017 |
| LH#3         | 150     |      | 0.709165 | 0.000013 |
| CR#1         | 25-35   |      | 0.709159 | 0.000009 |
| CR#2         | 55-65   |      | 0.709088 | 0.000017 |
| CR#3         | 85-95   |      | 0.709108 | 0.000017 |
| CKF#1        | 25-35   |      | 0.709170 | 0.000012 |
| CKF#2        | 55-65   |      | 0.709065 | 0.000015 |
| CKF#3        | 85-95   |      | 0.709053 | 0.000009 |
| S10#1        | 25-35   |      | 0.709204 | 0.000015 |
| S10#2        | 55-65   |      | 0.709121 | 0.000017 |
| S10#3        | 85-95   |      | 0.709078 | 0.000012 |
| LH#1         | 26      |      | 0.708965 | 0.000015 |
| LH#2         | 65      |      | 0.709347 | 0.000020 |
| WR#1         | 5       | 0.10 | 0.709570 | 0.000021 |
| WR#2         | 5       | 0.08 | 0.709465 | 0.000008 |
| WER#1        | 25-35   |      | 0.709590 | 0.000010 |
| WER#2        | 55-65   |      | 0.709606 | 0.000018 |
| WER#3        | 85-95   |      | 0.709549 | 0.000001 |
| CDW#1        |         |      | 0.709250 | 0.000010 |
| CWW#1        |         |      | 0.709274 | 0.000018 |
| CWW#2        |         |      | 0.709089 | 0.000018 |
| Aztec Ruin   |         |      |          |          |
| AZR#6        | 7       |      | 0.709650 | 0.000011 |
| AZR#7        | 32      |      | 0.709600 | 0.000017 |
| AZR#8        | 77      |      | 0.709558 | 0.000020 |
| AZR#3        | 7       |      | 0.709581 | 0.000013 |
| AZR#4        | 22      |      | 0.709560 | 0.000021 |
| AZR#5        | 47      |      | 0.709577 | 0.000019 |
| AZR#1        | 25      |      | 0.709899 | 0.000020 |
| AZR#2        | 55      |      | 0.709557 | 0.000017 |
| AR#1         | surface |      | 0.709495 | 0.000008 |
| AR#3         | surface |      | 0.709661 | 0.000021 |
| Salmon Ruin  |         |      |          |          |
| SR#4         | 12      | 0.50 | 0.710089 | 0.000019 |

|                    |         |      |          |          |
|--------------------|---------|------|----------|----------|
| SR#5               | 52      | 0.03 | 0.710106 | 0.000022 |
| SR#6               | 87      | 0.09 | 0.710043 | 0.000020 |
| SR#1               | 8       | 0.06 | 0.710148 | 0.000013 |
| SR#2               | 22      | 0.10 | 0.710157 | 0.000007 |
| SR#3               | 82      | 0.05 | 0.710095 | 0.000023 |
| SJR#1              | surface |      | 0.710288 | 0.000014 |
| SJR#2              | surface |      | 0.709912 | 0.000017 |
| AR#1               | surface |      | 0.709495 | 0.000008 |
| SJR#3              | surface |      | 0.706668 | 0.000017 |
| LPR#1              | surface |      | 0.711136 | 0.000013 |
| LOPR#1             | surface |      | 0.713987 | 0.000013 |
| AR#2               | surface |      | 0.709925 | 0.000022 |
| SJR#4              | surface |      | 0.710150 | 0.000017 |
| AR#3               | surface |      | 0.709661 | 0.000021 |
| SJR#5              | surface |      | 0.710376 | 0.000021 |
| Pueblo Bonito Corn |         |      |          |          |
| H254/258C          |         |      | 0.709280 | 0.000014 |
| H7673              |         |      | 0.709328 | 0.000011 |
| H254/258A          |         |      | 0.709394 | 0.000010 |
| H242/244A          |         |      | 0.709319 | 0.000016 |
| H242/244B          |         |      | 0.709475 | 0.000042 |
| H254/258B          |         |      | 0.709225 | 0.000018 |
| H10648             |         |      | 0.709892 | 0.000016 |
| Aztec Ruin Corn    |         |      | 0.710312 | 0.000019 |
| AZRU 1057          |         |      | 0.710166 | 0.000034 |
| AZRU 1052          |         |      | 0.709977 | 0.000012 |
| AZRU 9651          |         |      | 0.709801 | 0.000015 |
| AZRU 3853          |         |      | 0.710119 | 0.000010 |
| AZRU 533B          |         |      | 0.709791 | 0.000012 |
| AZRU 3921          |         |      | 0.709705 | 0.000016 |
| AZRU 9438          |         |      | 0.709694 | 0.000015 |
| AZRU 11091         |         |      | 0.709848 | 0.000011 |
| AZRU 533A          |         |      | 0.710062 | 0.000012 |
| AZRU 9341          |         |      |          |          |
