# Supplementary material
Source: PubMed Central journal article supplement (PMC240753)

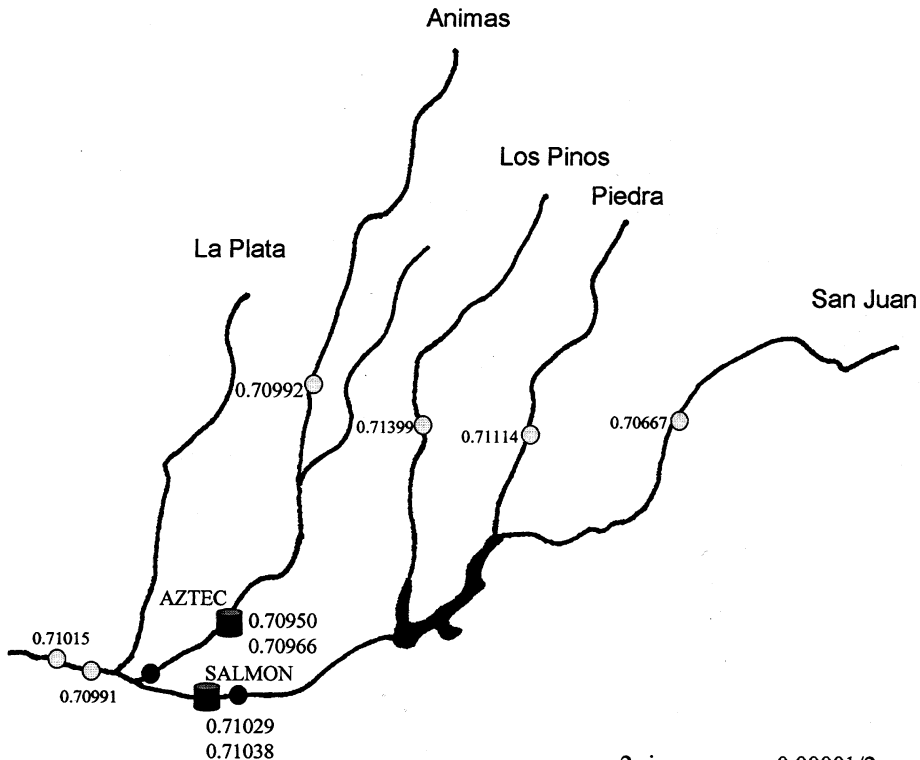

2 sigma error = 0.00001/2

Supplement: pnas_100_22_13111__5.pdf [file pnas_100_22_13111__5.pdf]
